# Supplementary material for: Solar-driven interfacial evaporation for water treatment: advanced research progress and challenges
Source: Royal Society of Chemistry journal article supplement (doi:10.1039/d2ta03321f), 2022-01-01
Supplement: d2ta03321f1.pdf [file d2ta03321f1.pdf]

## Supplementary Information

### Solar-driven interfacial evaporation for Water Treatment: Advanced Research Progress and Challenges

*Jiyan Li\**, Yanju Jing, Guoyu Xing, Meichen Liu, Yang Cui, Hanxue Sun, Zhaoqi

*Zhu, Weidong Liang, An Li\**

College of Petrochemical Technology, Lanzhou University of Technology,  
Langongping Road 287, Lanzhou 730050, P. R. China

\*E-mail: [lian2010@lut.cn](mailto:lian2010@lut.cn); [lijian3@163.com](mailto:lijian3@163.com)

**Table S1.** Acid and alkali resistance of SDIE

|    | Composition                                                                                              | Acidic/ Alkaline solution/pH                                                                       | Purification effect                                                                                    | Method                    | RE (kg m <sup>-2</sup> h <sup>-1</sup> )             | EE (%) | Ref. |
|----|----------------------------------------------------------------------------------------------------------|----------------------------------------------------------------------------------------------------|--------------------------------------------------------------------------------------------------------|---------------------------|------------------------------------------------------|--------|------|
| 1  | NiCoxSy- PANI@GF                                                                                         | HCl/pH=1;<br>NaOH/pH=14                                                                            | Structural stability without any corrosion.                                                            | Continuous immersion      | 1.3                                                  | 78.7   | 1    |
| 2  | Carbonized pencil shaving wastes (CPS)                                                                   | 1mol/L H <sub>2</sub> SO <sub>4</sub> /pH=1;<br>1mol/L NaOH/ pH=14                                 | No decompose or deform                                                                                 | Immersion and evaporation | 1.2                                                  | 82.2   | 2    |
| 3  | Copper-zinc-tin-selenide (CZTSe) nanocarambolas                                                          | 5×10 <sup>-4</sup> M H <sub>2</sub> SO <sub>4</sub> /pH=1,3;<br>5×10 <sup>-2</sup> M NaOH/pH=11,14 | H <sup>+</sup> and OH <sup>-</sup> concentrations decreases to 10 <sup>-3</sup> and 10 <sup>-1</sup> M | Immersion and evaporation | 1.528                                                | 86.4   | 3    |
| 4  | Ag-PDA@wood                                                                                              | H <sub>2</sub> SO <sub>4</sub> /pH~1,<br>NaOH/pH~14                                                | The evaporated water exhibits a pH close to 7                                                          | Evaporation               | 1.58                                                 | 88.6   | 4    |
| 5  | Polypyrrole-wax gourd                                                                                    | HCl/pH=1,<br>NaOH/pH=13                                                                            | Still kept the high and steady evaporation rates                                                       | Evaporation               | 1.57                                                 | 77.3   | 5    |
| 6  | Carbon cloth nanocomposite with biomimetic pelargonium hortorum-petal-like surface(CC-BPHPLS)            | pH~1, pH~14                                                                                        | The evaporated water exhibits a pH close to 7                                                          | Evaporation               | 1.42                                                 | 93     | 6    |
| 7  | Hydrophobic and porous carbon nanofiber(HPCNF) membrane                                                  | PH=3, PH=12                                                                                        | Evaporation rate is stable                                                                             | Immersion and evaporation | 1.43<br>1.42~1.43<br>(acid & alkaline)               | 87.5   | 7    |
| 8  | Sulfuric acid hydrothermal carbonized sugarcane (SHCSC)                                                  | 1 M H <sub>2</sub> SO <sub>4</sub> ,<br>1 M NaOH                                                   | The evaporation rates is stable.                                                                       | Immersion and evaporation | 2.32<br>(pure)<br>2.30<br>(acid)<br>2.27<br>(alkali) |        | 8    |
| 9  | Chitosan/gelatin-based IPN sponge incorporated with melanin-coated titania hollow nanospheres (CG@MPT-h) | HCl/pH=2~7,<br>NaOH/pH=7~11                                                                        | Evaporation rate is stable                                                                             | Evaporation               | 1.13                                                 | 78.9   | 9    |
| 10 | Pt <sub>3</sub> Ni-S-deposited Teflon (PTFE) Membrane                                                    | HCl/pH=1.2;<br>NaOH/pH=12                                                                          | Evaporation rate is stable                                                                             | Immersion and evaporation | 1.27<br>(pure)<br>0.93~1.04<br>(acid & alkaline)     | 80     | 10   |
| 11 | Aligned attapulgite-based aerogel                                                                        | pH=1 and 13                                                                                        | The pH of the condensed water is ca. 7                                                                 | Immersion and evaporation | 1.41                                                 | 87.6   | 11   |
| 12 | The Janus PDMS/PDA/PU evaporator                                                                         | pH=3~12                                                                                            | Evaporation rate is stable                                                                             | Immersion and evaporation | 1.2                                                  | 90.67  | 12   |

Table S1(contiued)

|    | Composition                                                                         | Acidic/ Alkaline solution/pH                                          | Purification effect                                                          | Method                           | RE (kg m <sup>-2</sup> h <sup>-1</sup> ) | EE (%) | Ref. |
|----|-------------------------------------------------------------------------------------|-----------------------------------------------------------------------|------------------------------------------------------------------------------|----------------------------------|------------------------------------------|--------|------|
| 13 | Multi-walled carbon nanotube (MWCNT) bucky paper                                    | 1 mol/L H <sub>2</sub> SO <sub>4</sub>                                | No damage. Evaporation rate is stable                                        | Immersion                        | 0.79                                     | 56     | 13   |
| 14 | A-MU/PAN-3# textile                                                                 | HCl/pH=1;<br>NaOH/pH=14                                               | Stable structure                                                             | Immersion                        | 1.4                                      | 89.2   | 14   |
| 15 | Multifunctional blacksand aggregate                                                 | 0.5M H <sub>2</sub> SO <sub>4</sub>                                   | Stable structure                                                             | Immersion (1 y)                  | 1.43                                     | 94.96  | 15   |
| 16 | GO/Mxene aerogel                                                                    | H <sub>2</sub> SO <sub>4</sub> ,NaOH<br>pH=1~14                       | The pH of condensate is ca. 7                                                | Evaporation                      | 1.27                                     | 90.7   | 16   |
| 17 | Carbonized loofah sponge                                                            | 1mol/L H <sub>2</sub> SO <sub>4</sub> /pH =1,<br>1 mol/L NaOH/ pH =14 | The pH of condensate is ca. 7                                                | solar distillation               | 1.36                                     | 83.7   | 17   |
| 18 | Ethanol-treated-carrot biochar,(ECB)                                                | 12 M HCl,<br>10 M NaOH                                                | Evaporation rate is stable                                                   | Evaporation                      | 2.04                                     | 127.8  | 18   |
| 19 | PVA hydrogel-based 3D evaporator                                                    | HCl/pH=1,<br>NaOH/pH=12.5                                             | The pH of the purified brine was close to neutral                            | Evaporation                      | 2.22(3.5 wt%NaCl)                        |        | 19   |
| 20 | KMnO <sub>4</sub> oxidized wood (K-wood)                                            | pH=2,12                                                               | The structure and evaporation rate are stable                                | Evaporation                      | 1.22                                     | 81.4   | 20   |
| 21 | Superhydrophobic silicone sponge with multi-walled carbon nanotubes (MWCNTs)        | 2 M H <sub>2</sub> SO <sub>4</sub> ,<br>2 M NaOH                      | The pH of aqueous solutions has a negligible effect on the evaporation rate. | Immersion (30 d) and evaporation | 1.72                                     | 92.4   | 21   |
| 22 | Porous foam based on cross-linked aromatic polymer (PDVB-PS)                        | 0.1 M HCl,<br>0.1 M NaOH                                              | The pH was close to neutral after desalination.                              | Evaporation                      | 1.3986                                   | 87.6   | 22   |
| 23 | Wood-TA-Fe <sup>3+</sup>                                                            | HCl/pH=2,<br>NaOH/pH =12                                              | The light absorbing layer can keep black                                     | Immersion (1 d) and evaporation  | 1.85                                     | 90     | 23   |
| 24 | Lotus-Inspired Janus biomimetic evaporator (MBE)                                    | 0.1 mol/L H <sub>2</sub> SO <sub>4</sub> ,<br>0.1 mol/L KOH           | The purified water meets the standards of drinking water                     | Evaporation                      | 1.597                                    | 74.2   | 24   |
| 25 | Solar evaporator constructed by poly(vinyl alcohol) and sodium lignosulfonate (SLS) | 1 mol/L HCl,<br>1 mol/L NaOH                                          | The pH of is ca. 7                                                           | Evaporation                      | 2.09                                     | 80.4   | 25   |
| 26 | KGM / Fe-MOF / PVA network                                                          | pH =2~14                                                              | Effect evaporation stability                                                 | Evaporation                      | 3.2                                      | 90     | 26   |
| 27 | Calcinated poly-melamine-formaldehyde sponge (MS)in air (AMS)                       | 0.1 mol/L HCl<br>pH~1,<br>0.1 mol/L NaOH<br>pH~14                     | The pH of the purified brine was close to neutral                            | Evaporation                      | 1.98                                     | 92     | 27   |

**Table S1**(contiued)

|    | <b>Composition</b>                     | <b>Acidic/ Alkaline solution/pH</b>                                                     | <b>Purification effect</b>                                      | <b>Method</b>             | <b>RE (kg m<sup>-2</sup> h<sup>-1</sup>)</b> | <b>EE (%)</b> | <b>Ref.</b> |
|----|----------------------------------------|-----------------------------------------------------------------------------------------|-----------------------------------------------------------------|---------------------------|----------------------------------------------|---------------|-------------|
| 28 | SHPP membrane                          | 1wt% CH <sub>3</sub> COOH<br>pH=2.8,<br>1wt% Na <sub>2</sub> CO <sub>3</sub><br>pH=11.7 | Structural stability                                            | Immersion                 | 1.68                                         | 97.3          | 28          |
| 29 | M-PPy sponge                           | 0.1 M HCl,<br>0.1 M NaOH                                                                | The evaporation rate and energy efficiency are almost unchanged | Immersion and evaporation | 1.447                                        | 84.72         | 29          |
| 30 | MXene/LSC hydrogels (MLH)              | 1mol/L HCl pH=1,<br>1 mol/L NaOH pH =14                                                 | The pH of the collected water was close to neutral              | Immersion and evaporation | 2.73                                         | 92.3          | 30          |
| 31 | PDA/PEI/PPy@PI-MS Photothermal Aerogel | HCl/pH=1,<br>NaOH/pH=13                                                                 | Stable evaporation efficiency                                   | Immersion and evaporation | 1.38                                         | 93.04         | 31          |
| 32 | Modified melamine foam                 | 0.5 M H <sub>2</sub> SO <sub>4</sub> /pH =1,<br>1 M NaOH/pH= 14                         | The purified water is close to neutral (pH=7).                  | Evaporation               | 1.38                                         | 86.9          | 32          |
| 33 | Black PVA sponge soaked in nitric acid | 0.5 M H <sub>2</sub> SO <sub>4</sub> ,<br>1M NaOH                                       | The pH of evaporated water is ca. 7                             | Evaporation               | 2.72                                         |               | 33          |

**Table S2.** Bacteriostasis and algal inhibition of SDIE

| Num. | Material                                                             | Bacteria species                                               | Antibacterial effect                                                                                | Method                                  | RE<br>(kg m <sup>-2</sup> h <sup>-1</sup> ) | EE<br>(%)        | Ref. |
|------|----------------------------------------------------------------------|----------------------------------------------------------------|-----------------------------------------------------------------------------------------------------|-----------------------------------------|---------------------------------------------|------------------|------|
| 1    | Cu@CuO/CG-aero Janus membrane                                        | E.coli                                                         | No bacteria were found in the solar steamed water                                                   | Evaporation decontamination             | 1.32                                        | 88               | 34   |
| 2    | Carbonized sorghum stalk                                             | Colonies cultured from seawater samples on tryptone agar plate | No bacterial colony was observed in the treated seawater                                            |                                         | 3.173                                       |                  | 35   |
| 3    | rGO/PTFE composite membrane                                          |                                                                | Chemical sterilization indicator color from light yellow to black, sterilization success            | Sterilizing with high temperature       |                                             | 84               | 36   |
| 4    | Activated carbon-juncus effusus (AC-JE)                              | Colonies cultured in petri dishes with original water samples  | No obvious impurities were detected in purified lake water                                          |                                         | 2.23                                        |                  | 37   |
| 5    | MXene/cellulose photothermal membrane                                | E.coli<br>S. aureus                                            | After 24 hours, the inhibition rates of E.coli and S. aureus were 99.99 % and 99.98 %, respectively | Physical damage to bacterial membranes  | 1.44                                        | 90               | 38   |
| 6    | HHNDL membrane                                                       | E.coli<br>S. aureus                                            | 10 <sup>6</sup> ultra-high quantities of bacteria can be completely intercepted                     | Evaporation interception                | 1.657                                       | 86.6             | 39   |
| 7    | Copper-zinc-tin-selenide (CZTSe) nanocarambolas                      | S. aureus                                                      | CZTSe membrane had no biological pollution                                                          | Evaporation interception                | 1.528                                       | 86.4             | 3    |
| 8    | Ag-PDA@wood                                                          | E.coli                                                         | 24 h later, bacteria almost completely killed                                                       | Sterilization effect of Ag <sup>+</sup> | 1.58                                        | 88.6             | 4    |
| 9    | Localized interfacial electrical-heating (LIEH) evaporation          | E. coli                                                        | All E. coli bacterial cells were killed                                                             | Sterilizing with high temperature       | 14.53                                       | 90               | 40   |
| 10   | Double-layered GO-chitosan/ZnO scaffold (GCZ scaffold)               | S. aureus<br>E. coli                                           | 72 h later, the number of bacterial cells decreased                                                 | Antibacterial effect of ROS             | 13.5<br>(10 sun)                            | 90.8<br>(10 sun) | 41   |
| 11   | FTCS-PDA/BNC membrane                                                | E.coli                                                         | No living bacteria were found after exposure for 10 min                                             | Local temperature rise sterilization    | 1.0                                         | 68               | 42   |
| 12   | Vertically oriented graphene nanosheets and graphene aerogel (VG/GA) |                                                                | Bioindicator color from yellow to purple, sterilization success                                     | Sterilizing with high temperature       | 12.32<br>(10 sun)                           | 89.4<br>(10 sun) | 43   |

**Table S2**(continued)

| Num. | Material                                                           | Bacteria species                 | Antibacterial effect                                                                            | Method                                        | RE<br>(kg m <sup>-2</sup> h <sup>-1</sup> ) | EE<br>(%)       | Ref. |
|------|--------------------------------------------------------------------|----------------------------------|-------------------------------------------------------------------------------------------------|-----------------------------------------------|---------------------------------------------|-----------------|------|
| 13   | PU/CNT/ZCB fabrics                                                 | E. coli<br>S. aureus             | S. aureus decreased by 86.5 %, E. coli decreased by 96.2 %                                      |                                               | 2.2                                         | 93.5            | 44   |
| 14   | W-cotton cloth-NCC                                                 | E. coli                          | Retention rate of E. coli can reach more than 99.9 % under 10 <sup>6</sup> bacteria             | Evaporation interception                      | 1.88                                        | 89.9            | 45   |
| 15   | CPHs based on METAC and PPy                                        | E. coli<br>S. aureus             | Almost all S. aureus and E. coli were killed                                                    | Mechanism of cationic fixation                | 1.592                                       |                 | 46   |
| 16   | Ag <sub>3</sub> PO <sub>4</sub> -rGO nanocomposite-coated textiles | E. coli<br>S. aureus             | Antibacterial rates against E. coli and S. aureus were higher than 99 %                         | Sterilization of Ag <sup>+</sup> and ROS      | 1.31                                        | 86.8            | 47   |
| 17   | SA/PVA/HACC hydrogel foam                                          |                                  | After 15 days, bacterial coverage on gel surface was lowest                                     | Mechanism of cationic fixation                | 2.12                                        |                 | 48   |
| 18   | GO/Mxene aerogel                                                   | E. coli                          | No colonies were found after treatment                                                          | Sterilizing with high temperature             | 1.27                                        | 90.7            | 16   |
| 19   | Hierarchically porous radiation-absorbing hydrogel (hp-RAH)        | S. aureus<br>E. coli             |                                                                                                 | Bactericidal effect of Ag nanoparticles       | 1.983                                       | 95              | 49   |
| 20   | Ag@MXene/PAN                                                       | E. coli                          | Antibacterial efficiency at 12 h, 18 h and 24 h reached 85.4 %, 98.8 % and 99.9 %, respectively | Sterilization effect of Ag <sup>+</sup>       | 2.08                                        | 92.4            | 50   |
| 21   | MoS <sub>2</sub> @PEI/MCE membrane                                 | Artificial colonies              | The agar plate method showed good antibacterial activity                                        | Photothermal synergistic antibacterial effect |                                             | 92<br>(3.7 sun) | 51   |
| 22   | PPy origami                                                        | Bacteria in Colorado River Water | Bacteria removed from the Colorado River                                                        |                                               | 2.12                                        | 91.5            | 52   |

Table S2(continued)

| Num. | Material                                                            | Bacteria species                                                                                                                | Antibacterial effect                                                                                              | Method                                     | RE<br>(kg m <sup>-2</sup> h <sup>-1</sup> ) | EE<br>(%) | Ref. |
|------|---------------------------------------------------------------------|---------------------------------------------------------------------------------------------------------------------------------|-------------------------------------------------------------------------------------------------------------------|--------------------------------------------|---------------------------------------------|-----------|------|
| 23   | Carbon and Ag <sup>+</sup> loaded on pumice ( P-C-Ag <sup>+</sup> ) | E. coli                                                                                                                         | Almost all E. coli were killed                                                                                    | Sterilization effect of Ag <sup>+</sup>    | 1.395                                       | 88.8      | 53   |
| 24   | All-fiber porous cylinder-like foam (AFPCF)                         | S. aureus; MRSA; S. epidermidis; E. coli                                                                                        | within 10 min of irradiation,99.86% E. coli, 99.91% S. epidermidis, 99.96% S. aureus, and 99.98% MRSA were killed | Sterilization effect of ROS                | 3.6                                         |           | 54   |
| 25   | Ti-Ag-O nanoporous powders                                          | E. coli<br>S. aureus<br>Bacillus subtilis (B.S);                                                                                | Ti-Ag-O significantly inhibited the reproduction of E. coli and S. aureus                                         | Sterilization effect of Ag <sup>+</sup>    | 2.27                                        | 72        | 55   |
| 26   | Interfacial-heating-based solar steam sterilization device          | CC09;<br>Bacillus cereus (B.C.);<br>Bacillus stearothermophilus (B.St.)<br>Gram-positive (Escherichia coli, Bacillus subtilis); | For all kinds of bacterial spores, it achieved over 8 LRE                                                         | Sterilizing with high temperature          | 1.21                                        | 80        | 56   |
| 27   | MnCDs@PPy                                                           | Gram-negative (Staphylococcus aureus, Staphylococcus aureus )                                                                   | After purification,negligible colonies were seen on the surface plate                                             | Antibacterial activity of oxidative stress | 1.68                                        | 96.4      | 57   |
| 28   | KGM / Fe-MOF / PVA network                                          | E. coli<br>Coliform                                                                                                             | E. coli and Coliform reduced to below US drinking water kit levels                                                |                                            | 3.2                                         | 90        | 26   |
| 29   | Carbonized corncobs (C-corncoobs)                                   | Multiple colonies incubated in actual seawater                                                                                  | No colonies formed on agar plates after seawater purification                                                     |                                            | 1.358                                       | 86.7      | 58   |
| 30   | Interfacial evaporator within a solar vacuum tube                   | E. coli<br>G. stearothermophilus biological                                                                                     | After cultured at 56 °C for 24 h, the sterilization was successful                                                | Sterilizing with high temperature          |                                             | 49        | 59   |

**Table S3.** Removal heavy metals of SDIE

|   | Composition                                    | Species of ions                                                                                                                                                                                                                                                                                                                   | Removal effect                                                                                                       | Removal method                                               | RE<br>(kg m <sup>-2</sup> h <sup>-1</sup> ) | EE<br>(%) | Ref. |
|---|------------------------------------------------|-----------------------------------------------------------------------------------------------------------------------------------------------------------------------------------------------------------------------------------------------------------------------------------------------------------------------------------|----------------------------------------------------------------------------------------------------------------------|--------------------------------------------------------------|---------------------------------------------|-----------|------|
| 1 | GO/MXene aerogel                               | The initial concentration (µg L <sup>-1</sup> ):<br>Mn <sup>6+</sup> =8×10 <sup>6</sup> , Cd <sup>2+</sup> =8×10 <sup>5</sup> , Pb <sup>2+</sup> =7×10 <sup>5</sup> ,<br>Cu <sup>2+</sup> =2×10 <sup>5</sup> , Ni <sup>2+</sup> =9×10 <sup>4</sup> ,<br>Zn <sup>2+</sup> =2×10 <sup>5</sup> , Fe <sup>2+</sup> =2×10 <sup>5</sup> | Ion rejection rate was 99.9% after<br>purification                                                                   | Solar driven water<br>purification                           | 1.27                                        | 90.7      | 16   |
| 2 | 3D-structured carbonized<br>sunflower<br>heads | Cu <sup>2+</sup> , Ni <sup>2+</sup> and Pb <sup>2+</sup>                                                                                                                                                                                                                                                                          | Concentrations of heavy metal ions<br>decreased by 4 ~ 6 orders of magnitude                                         | Solar driven water<br>purification                           | 1.51                                        | 100.4     | 60   |
| 3 | rGO-Ag/SA@PU                                   | Pb <sup>2+</sup> , Cu <sup>2+</sup> , Cd <sup>2+</sup> (1500 mg/L)                                                                                                                                                                                                                                                                | Concentrations of all heavy metal ions<br>were less than 0.1 mg / L                                                  | Solar driven water<br>purification                           | 2.02                                        | 91        | 61   |
| 4 | Meat and bonemeal<br>biochar (MBB)             | Pb <sup>2+</sup> (1mg/L), Cu <sup>2+</sup> (2mg/L), Zn <sup>2+</sup><br>(5mg/L) and Cd <sup>2+</sup> (0.1mg/L)                                                                                                                                                                                                                    | Concentrations of the four ions<br>decreased by about 3 orders of<br>magnitude                                       | Solar driven water<br>purification                           | 1.48                                        | 131.2     | 62   |
| 5 | Poly(N-isopropyl<br>acrylamide) hydrogel       | Pb <sup>2+</sup> =25ppm                                                                                                                                                                                                                                                                                                           | After the first treatment, the Pb <sup>2+</sup><br>concentration was 3.7 ppm and 0.012<br>ppm after the second cycle | Absorbing pure water<br>while removing harmful<br>impurities |                                             |           | 63   |
| 6 | Carbonized loofah sponge                       | Pb <sup>2+</sup> , Cu <sup>2+</sup> , Cr <sup>3+</sup> (5000 mg/L)                                                                                                                                                                                                                                                                | All three ions reduced by 4 orders of<br>magnitude                                                                   | Solar driven water<br>purification                           | 1.36                                        | 83.7      | 17   |
| 7 | KGM / Fe-MOF / PVA<br>network                  | Cd <sup>2+</sup> , Cr <sup>3+</sup> , Cr <sup>6+</sup> , Cu <sup>2+</sup> , Ni <sup>2+</sup> , Ag <sup>+</sup> , Zn <sup>2+</sup> ,<br>Pb <sup>2+</sup> , Se <sup>2+</sup> , As <sup>5+</sup> , Hg <sup>2+</sup> (>10 <sup>4</sup> ppb)                                                                                           | Total concentration of heavy metal<br>ions decreased by 6 ~ 9 orders of<br>magnitude                                 | Adsorption and solar<br>distillation                         | 3.2                                         | 90        | 26   |



**Table S3**(continued)

|    | <b>Composition</b>                                                      | <b>Species of ions</b>                                                                                                                     | <b>Removal effect</b>                                                                                                                                                     | <b>Removal method</b> | <b>RE<br/>(kg m<sup>-2</sup> h<sup>-1</sup>)</b> | <b>EE<br/>(%)</b> | <b>Ref.</b> |
|----|-------------------------------------------------------------------------|--------------------------------------------------------------------------------------------------------------------------------------------|---------------------------------------------------------------------------------------------------------------------------------------------------------------------------|-----------------------|--------------------------------------------------|-------------------|-------------|
| 8  | STA-EGaIn/lignin-CNC aerogel (SLC aerogel)                              | Zn <sup>2+</sup> , Ni <sup>2+</sup> , Cu <sup>2+</sup> , Fe <sup>3+</sup>                                                                  | The ion removal rate was 99 % after treatment                                                                                                                             | Solar distillation    | 1.29                                             | 94                | 64          |
| 9  | Chemically-treated carbonized wood                                      | Cu <sup>2+</sup> , Pb <sup>2+</sup> , Cd <sup>2+</sup> , Zn <sup>2+</sup> , Ni <sup>2+</sup> ( 0.1mol L <sup>-1</sup> )                    | The adsorption capacity of carbonized wood for various metal ions was Cu <sup>2+</sup> > Pb <sup>2+</sup> > Cd <sup>2+</sup> > Zn <sup>2+</sup> > Ni <sup>2+</sup>        | Adsorption            | 1.85                                             |                   | 65          |
| 10 | Gold nanostructure with the shape of a trepang (nano-trepang)           | Hg <sup>2+</sup> , Cd <sup>2+</sup> ,Ag <sup>+</sup>                                                                                       | The concentration of heavy metal ions drop to 0.01 mg L <sup>-1</sup> after purification                                                                                  | Solar distillation    | 2.7                                              | 79.3              | 66          |
| 11 | PDA/CB@PP non-woven fabrics                                             | Cu <sup>2+</sup> , Fe <sup>3+</sup> Sr <sup>2+</sup> , Zn <sup>2+</sup>                                                                    | The rejection rate of ions exceeds 99.9 %                                                                                                                                 | Solar distillation    | 1.68                                             | 91.5              | 67          |
| 12 | Carbon nanofiber decorated carbonized loofah (CL-CNF)                   | Ba <sup>2+</sup> , Cu <sup>2+</sup> , Mn <sup>2+</sup> , and Ni <sup>2+</sup> (100 mg L <sup>-1</sup> )                                    | Removal rates of ions were higher than 99.8 %                                                                                                                             | Solar distillation    | 1.72                                             | 92.5              | 68          |
| 13 | Cellulose nanofibril/polylactic acid/polyaniline (CNF/PLA/PANI) aerogel | The waste steel treatment solution (pH≈ 0.19) with an Fe <sup>3+</sup> concentration of up to 97600 mg/L                                   | The concentration of Fe <sup>3+</sup> in the collected steam water (pH≈ 7) was reduced to 9.8 mg/L                                                                        | Solar distillation    | 1.58                                             | 90                | 69          |
| 14 | Wood/Fe <sub>2</sub> O <sub>3</sub> /CNT                                | Cr <sup>3+</sup> , Pb <sup>2+</sup> , Zn <sup>2+</sup> , and Cu <sup>2+</sup>                                                              | The retention rates of four ions were all above 99 %                                                                                                                      | Solar distillation    | 1.42                                             | 87.2              | 70          |
| 15 | Ti <sub>3</sub> C <sub>2</sub> /MoS <sub>2</sub> nanocomposite          | The Cu <sup>2+</sup> , Cr <sup>3+</sup> (mg/L), Cd <sup>2+</sup> (109 mg/L), Zn <sup>2+</sup> (82.6 mg/L), and Pb <sup>2+</sup> (153 mg/L) | After purification, the concentrations of Cr <sup>3+</sup> , Cd <sup>2+</sup> , Zn <sup>2+</sup> and Pb <sup>2+</sup> were 0.06, 0.061, 0.11 and 8.3 mg / L, respectively | Solar distillation    | 1.36                                             | 87.2              | 71          |

**Table S3**(continued)

|    | Composition                                                                              | Species of ions                                                                                                 | Removal effect                                                                                                                                                                                     | Removal method                  | RE<br>(kg m <sup>-2</sup> h <sup>-1</sup> ) | EE<br>(%) | Ref. |
|----|------------------------------------------------------------------------------------------|-----------------------------------------------------------------------------------------------------------------|----------------------------------------------------------------------------------------------------------------------------------------------------------------------------------------------------|---------------------------------|---------------------------------------------|-----------|------|
| 16 | Carbon nanotubes aerogel-coated wood (CACW)                                              | Cr <sup>2+</sup> , Ni <sup>2+</sup> , Cu <sup>2+</sup> , Zn <sup>2+</sup> (1000mg/L)                            | The concentration of heavy metal ions decreased significantly after treatment                                                                                                                      | Solar distillation              | 2.22                                        | 93.2      | 72   |
| 17 | Ultrablack carbon aerogels (CAs)                                                         | Cr <sup>3+</sup> , Cu <sup>2+</sup> , Ni <sup>2+</sup> , Zn <sup>2+</sup> and Pb <sup>2+</sup>                  | The concentrations of heavy metal ions were below 0.25 mg L <sup>-1</sup>                                                                                                                          | Solar distillation              | 1.37                                        | 87.51     | 73   |
| 18 | vapor generator(cotton core, polystyrene foam, black nonwoven cotton film)               | Cu <sup>2+</sup> , Cr <sup>3+</sup> , Pb <sup>2+</sup>                                                          | After purification, the concentration of Cu <sup>2+</sup> was 0.066 mg / L, the concentration of Cr <sup>3+</sup> and Pb <sup>2+</sup> was < 0.01 mg / L                                           | Evaporation purification effect | 1.62                                        |           | 74   |
| 19 | Composite functional layer of polyetherimide modified CER and PEDOT-based conductive ink | Pb <sup>2+</sup> (24000 mg/L), Cu <sup>2+</sup> (31750 mg/L) and Cd <sup>2+</sup> (41250 mg/L)                  | Three kinds of ion concentration were less than 0.1 ppm, the removal rates were more than 99.9 %                                                                                                   | Solar distillation              | 1.42                                        | 82        | 75   |
| 20 | MXene/PVA modified PC (MPCF)                                                             | Cr <sup>3+</sup> , Cu <sup>2+</sup> , Pb <sup>2+</sup> , Zn <sup>2+</sup>                                       | All the heavy metal ion concentrations were lower than WHO requirement                                                                                                                             | Solar distillation              | 3.38                                        | 132.9     | 76   |
| 21 | CNT/starch hybrid biohydrogel                                                            | Fe <sup>3+</sup> , Cu <sup>2+</sup> , Ni <sup>2+</sup> , Cr <sup>6+</sup> , Cd <sup>2+</sup> , Zn <sup>2+</sup> | The ion concentration decreased by 5-6 orders of magnitude                                                                                                                                         | Solar distillation              | 2.77                                        | 88        | 77   |
| 22 | Pt <sub>3</sub> Ni-S-deposited Teflon (PTFE) membrane                                    | Cu <sup>2+</sup> , Cd <sup>2+</sup> , Cr <sup>3+</sup> , Ba <sup>2+</sup> , Pb <sup>2+</sup> (100mg/L)          | After purification, the concentrations of Cu <sup>2+</sup> , Cd <sup>2+</sup> , Cr <sup>3+</sup> , Ba <sup>2+</sup> , Pb <sup>2+</sup> were 0.018, 0.023, 0.036, 0.038, 0.051 mg / L, respectively | Solar distillation              | 1.27                                        | 80        | 10   |

**Table S3**(continued)

|    | <b>Composition</b>                                                                               | <b>Species of ions</b>                                                                                                                       | <b>Removal effect</b>                                                                                                                                                                                   | <b>Removal method</b> | <b>RE (kg m<sup>-2</sup> h<sup>-1</sup>)</b> | <b>EE (%)</b> | <b>Ref.</b> |
|----|--------------------------------------------------------------------------------------------------|----------------------------------------------------------------------------------------------------------------------------------------------|---------------------------------------------------------------------------------------------------------------------------------------------------------------------------------------------------------|-----------------------|----------------------------------------------|---------------|-------------|
| 23 | Carbonized aerogel                                                                               | Cu <sup>2+</sup> , Zn <sup>2+</sup> , Pb <sup>2+</sup> , Cd <sup>2+</sup> (5g/L)                                                             | After purification, the ion concentrations of Cu <sup>2+</sup> , Zn <sup>2+</sup> , Pb <sup>2+</sup> and Cd <sup>2+</sup> were 0.5, 2, 0.01 and 0.1 mg / L, respectively                                | Solar distillation    | 2.1                                          |               | 78          |
| 24 | HHNDL membrane                                                                                   | Fe <sup>3+</sup> , Cu <sup>2+</sup> , Cr <sup>6+</sup>                                                                                       | Ion rejection rate is close to 100 %                                                                                                                                                                    | Solar distillation    | 1.657                                        | 86.6          | 39          |
| 25 | Graphene assembled porous fiber-based Janus membrane                                             | Cu <sup>2+</sup> , Mn <sup>2+</sup> , Cd <sup>2+</sup>                                                                                       | The ion concentration decreased to less than 10 mg / L, and the ion retention rate was about 99.9 %                                                                                                     | Solar distillation    | 1.4                                          | 87.9          | 79          |
| 26 | Carbon cloth nanocomposite with a biomimetic pelargonium hortorum-petal-like surface (CC-BPHPLS) | Cr <sup>3+</sup> , Cd <sup>2+</sup> , Ni <sup>2+</sup> , Ag <sup>+</sup> , Pb <sup>2+</sup> , Cu <sup>2+</sup> Pd <sup>2+</sup> (1000ppm)    | Ion rejection rate of ion solution is close to 100 %                                                                                                                                                    | Solar distillation    | 1.42                                         | 93            | 6           |
| 27 | PPy-compounded air-laid paper (PPy-AP)                                                           | Na <sup>+</sup> , Cu <sup>2+</sup> , Pb <sup>2+</sup> and Cd <sup>2+</sup>                                                                   | The ion rejection of metal ions can reach 99.99%                                                                                                                                                        | Solar distillation    | 2.0                                          | 93.5          | 80          |
| 28 | Solar evaporator constructed by poly(vinyl alcohol) and sodium lignosulfonate (SLS)              | Co <sup>2+</sup> , Ni <sup>2+</sup> ,Cu <sup>2+</sup> and Zn <sup>2+</sup> (1000mg/L)                                                        | Retention rates of four ions were above 99.9 %                                                                                                                                                          | Solar distillation    | 2.09                                         | 80.4          | 25          |
| 29 | Graphene/MoO <sub>3-x</sub> coated porous Nickel (Ni-G-MoO <sub>3-x</sub> )                      | Pb <sup>2+</sup> (116mg/L),Cu <sup>2+</sup> (112mg/L), Cd <sup>2+</sup> (102mg/L), Cr <sup>3+</sup> (104mg/L) and Zn <sup>2+</sup> (106mg/L) | After purification, the ion concentrations of Pb <sup>2+</sup> , Cu <sup>2+</sup> , Cd <sup>2+</sup> , Cr <sup>3+</sup> , Zn <sup>2+</sup> were 0.001, 0.0002, 0.0008, 0.002, 0.014mg / L, respectively | Solar distillation    | 1.5                                          | 95            | 81          |

**Table S3**(continued)

|    | Composition                                                                                   | Species of ions                                                                                                            | Removal effect                                                                                                                                                              | Removal method     | RE<br>(kg m <sup>-2</sup> h <sup>-1</sup> ) | EE<br>(%) | Ref. |
|----|-----------------------------------------------------------------------------------------------|----------------------------------------------------------------------------------------------------------------------------|-----------------------------------------------------------------------------------------------------------------------------------------------------------------------------|--------------------|---------------------------------------------|-----------|------|
| 30 | PVA hydrogel-based 3D evaporator                                                              | Na <sup>+</sup> , K <sup>+</sup> , Li <sup>+</sup> , Cu <sup>2+</sup> , Mg <sup>2+</sup>                                   | After desalination, the above ion concentration decreased by 3 orders of magnitude                                                                                          | Solar distillation | 2.22<br>(3.5 wt % NaCl)                     |           | 19   |
| 31 | Situ-polymerized nickel foam (IPNF)                                                           | Cu <sup>2+</sup> , Pb <sup>2+</sup> , Cd <sup>2+</sup> and Cr <sup>3+</sup> (1000mg/L)                                     | After purification, the concentrations of Cu <sup>2+</sup> , Pb <sup>2+</sup> , Cd <sup>2+</sup> , Cr <sup>3+</sup> were 0.0085, 0.0063, 0.0042, 0.0033mg / L, respectively | Solar distillation | 1.74                                        | 90        | 82   |
| 32 | Corn straw-based microcrystalline                                                             | Cu <sup>2+</sup> , Cr <sup>6+</sup> , Zn <sup>2+</sup> (400 mg/L)                                                          | Three metal concentrations were reduced by 95 %, 88 % and 90 %, respectively                                                                                                | Adsorption         | 1.44                                        | 88        | 83   |
|    | Oxidized microcrystalline cellulose                                                           | Cu <sup>2+</sup> , Cr <sup>6+</sup> , Zn <sup>2+</sup> (400 mg/L)                                                          | After purification, the ion concentrations decreased by 99 %, 89 % and 92 %, respectively                                                                                   | Adsorption         | 1.36                                        | 84        |      |
| 33 | Carbon nanotube/polyvinyl alcohol porous composite evaporator                                 | Cu <sup>2+</sup> (6.47 mg/L), Ni <sup>2+</sup> (6.9 mg/L), Cr <sup>6+</sup> (7.28 mg/L) , and Zn <sup>2+</sup> (7.97 mg/L) | The removal rate of Cr <sup>6+</sup> was more than 99.86 %, and the removal rate of other ions was more than 96.81 %                                                        | Solar distillation | 1.34                                        | 85.71     | 84   |
| 34 | Hydrophobic soot coated cloth / hydrophilic cloth double layer on PE coated cellulose aerogel | Ni <sup>2+</sup> , Cu <sup>2+</sup> , Zn <sup>2+</sup> , and Pb <sup>2+</sup> (1000 mg/L)                                  | Concentrations of metal ions after evaporation were lower than China standard limits                                                                                        | Solar distillation | 1.308                                       | 91.2      | 85   |

Table S3(continued)

|    | Composition                                                 | Species of ions                                                                                                                                                                                                                           | Removal effect                                                                                                                                                        | Removal method     | RE<br>(kg m <sup>-2</sup> h <sup>-1</sup> ) | EE<br>(%) | Ref. |
|----|-------------------------------------------------------------|-------------------------------------------------------------------------------------------------------------------------------------------------------------------------------------------------------------------------------------------|-----------------------------------------------------------------------------------------------------------------------------------------------------------------------|--------------------|---------------------------------------------|-----------|------|
| 35 | Copper-zinc-tin-selenide<br>(CZTSe) nanocarambolas          | Cu <sup>+</sup> , Zn <sup>2+</sup> , Sn <sup>4+</sup> and Se <sup>2-</sup>                                                                                                                                                                | After evaporation, there was no presence of Cu or Se element                                                                                                          | Solar distillation | 1.528                                       | 86.4      | 3    |
| 36 | Cu-CAT/Wood                                                 | Cu <sup>2+</sup> and Cd <sup>2+</sup> (100 mg/L)                                                                                                                                                                                          | Concentrations of Cu <sup>2+</sup> and Cd <sup>2+</sup> were lower than 1 mg /L                                                                                       | Solar distillation | 1.8                                         |           | 86   |
| 37 | Carbon hybrid aerogel (CHA)                                 | Fe <sup>3+</sup> , Cu <sup>2+</sup> ,<br>Cd <sup>2+</sup> , Pb <sup>2+</sup> , Zn <sup>2+</sup> , Ni <sup>2+</sup> , Al <sup>3+</sup> ,<br>Se <sup>2+</sup> , Mn <sup>2+</sup> , Sn <sup>3+</sup> , V <sup>5+</sup> , and Li <sup>+</sup> | Concentrations of metal ions decreased by three orders of magnitude                                                                                                   | Solar distillation | 2.1                                         |           | 87   |
| 38 | CuO@PDA/PB                                                  | Na <sup>+</sup> , K <sup>+</sup> , Ca <sup>2+</sup> , Mg <sup>2+</sup> , Cu <sup>2+</sup> and<br>Cr <sup>3+</sup>                                                                                                                         | After distillation, the above ion concentrations decreased significantly and were lower than WHO standards                                                            | Solar distillation | 1.39                                        | 87.1      | 88   |
| 39 | Nanofibrous hydrogel-reduced graphene oxide (NHRG) membrane | Cd <sup>2+</sup> , Cu <sup>2+</sup> , Ni <sup>2+</sup> , Pb <sup>2+</sup> , Zn <sup>2+</sup> (<br>100 mg/L.)                                                                                                                              | The removal was consistently more than 99.5%                                                                                                                          | Solar distillation | 1.85                                        | 95.4      | 89   |
| 40 | 3D interconnected porous carbon foam                        | Cu <sup>2+</sup> , Ni <sup>2+</sup> , Cd <sup>2+</sup> , Zn <sup>2+</sup> (5g/L)                                                                                                                                                          | After purification, the ion concentrations of Cu <sup>2+</sup> , Ni <sup>2+</sup> , Cd <sup>2+</sup> and Zn <sup>2+</sup> were 0.5, 1, 0.1 and 2 mg / L, respectively | Solar distillation | 10.9<br>(natural convection)                |           | 90   |
| 41 | PPY/BTA hydrogel                                            | Wastewater containing Ag-NPs                                                                                                                                                                                                              | Water collected by evaporation was free of pollutants                                                                                                                 | Solar distillation | 1.9                                         | 89        | 91   |
| 42 | N,S-GO/PPy foam                                             | Fe <sup>3+</sup> , Cu <sup>2+</sup> , Cr <sup>6+</sup> , Na <sup>+</sup> , K <sup>+</sup>                                                                                                                                                 | The concentration of main ions in wastewater decreased by 2 to 6 orders of magnitude                                                                                  | Solar distillation | 1.32                                        | 90.5      | 92   |

**Table S3**(continued)

|    | <b>Composition</b>                                                              | <b>Species of ions</b>                                                                                                                               | <b>Removal effect</b>                                                                                                                                                         | <b>Removal method</b> | <b>REe<br/>(kg m<sup>-2</sup> h<sup>-1</sup>)</b> | <b>EE<br/>(%)</b> | <b>Ref.</b> |
|----|---------------------------------------------------------------------------------|------------------------------------------------------------------------------------------------------------------------------------------------------|-------------------------------------------------------------------------------------------------------------------------------------------------------------------------------|-----------------------|---------------------------------------------------|-------------------|-------------|
| 43 | PSN-functionalized reduced graphene oxide (PSN-rGO) aerogel                     | Hg <sup>2+</sup> ( 200 ppb),Cd <sup>2+</sup> , Pb <sup>2+</sup> , Ni <sup>2+</sup> ,Cu <sup>2+</sup> ,Zn <sup>2+</sup>                               | Ion rejection rate close to 100 %, Hg <sup>2+</sup> concentration below 1 ppb                                                                                                 | Solar distillation    | 1.55                                              | 90.8              | 93          |
| 44 | Ti <sub>3</sub> C <sub>2</sub> T <sub>x</sub> MXene/GO/polyaniline hybrids(MGP) | Cr <sup>3+</sup> , Cu <sup>2+</sup> , Pb <sup>2+</sup> , Zn <sup>2+</sup>                                                                            | The rejection of metal ions was about 99.9 %                                                                                                                                  | Solar distillation    | 3.94                                              | 135.6             | 94          |
| 45 | MnCDs@PPy                                                                       | Ca <sup>2+</sup> , Pb <sup>2+</sup> , Cr <sup>3+</sup> , Mg <sup>2+</sup> , Ti <sup>3+</sup> , Hg <sup>2+</sup> , Fe <sup>3+</sup> ,Zn <sup>2+</sup> | All above ions are excluded                                                                                                                                                   | Solar distillation    | 1.68                                              | 96.4              | 57          |
| 46 | PPy@PEI@A-CNF aerogel                                                           | Mn <sup>2+</sup> , Co <sup>2+</sup> ,Cu <sup>2+</sup> and Cr <sup>3+</sup> (500mg/L)                                                                 | After purification, the ion concentrations of Mn <sup>2+</sup> , Co <sup>2+</sup> , Cu <sup>2+</sup> and Cr <sup>3+</sup> were 0.42, 0.27, 0.58 and 0.39 mg / L, respectively | Solar distillation    | 1.66                                              | 94.62             | 95          |
| 47 | MoS <sub>2</sub> /SA@melamine foam                                              | Pb <sup>2+</sup> , Cu <sup>2+</sup> , Fe <sup>3+</sup> and Zn <sup>2+</sup> (200mg/L)                                                                | After purification, the ion concentrations of Pb <sup>2+</sup> , Cu <sup>2+</sup> , Fe <sup>3+</sup> and Zn <sup>2+</sup> were 0.08, 66.9, 98.4 and 107 mg / L, respectively  | Adsorption            | 1.92 ( 3.5wt%NaCl )                               | 90 ( 3.5wt%NaCl ) | 96          |
| 48 | Situ-polymerized MnO <sub>2</sub> nanowires/chitosan hydrogel(SPM-CH)           | Ca <sup>2+</sup> , Pb <sup>2+</sup> , Cr <sup>3+</sup> , Mg <sup>2+</sup>                                                                            | Ca <sup>2+</sup> decreased obviously, Pb <sup>2+</sup> , Cr <sup>3+</sup> , Mg <sup>2+</sup> were removed successfully                                                        | Solar distillation    | 1.78                                              | 90.6              | 97          |
| 49 | All-fiber porous cylinder-like foam (AFPCF)                                     | Na <sup>+</sup> , Mg <sup>2+</sup> , K <sup>+</sup> , Ca <sup>2+</sup> , and Pb <sup>2+</sup> (10 <sup>3</sup> mg/L,simulated seawater)              | Ion concentration decreased to 10-1 mg / L and removal efficiency reached 99.9 %                                                                                              | Solar distillation    | 3.6                                               |                   | 54          |
| 50 | SiO <sub>2</sub> /MXene/HPTFE Janus membrane                                    | Cu <sup>2+</sup> , Mn <sup>2+</sup> , Cd <sup>2+</sup>                                                                                               | Ion rejection after purification was 99.9 %                                                                                                                                   | Solar distillation    | 1.53                                              | 85.6              | 98          |

Table S3(continued)

|    | Composition                                                                         | Species of ions                                                                                                             | Removal effect                                                                                                                                            | Removal method     | RE<br>(kg m <sup>-2</sup> h <sup>-1</sup> ) | EE<br>(%) | Ref. |
|----|-------------------------------------------------------------------------------------|-----------------------------------------------------------------------------------------------------------------------------|-----------------------------------------------------------------------------------------------------------------------------------------------------------|--------------------|---------------------------------------------|-----------|------|
| 51 | PDA-t@PU                                                                            | Ni <sup>2+</sup> , Cu <sup>2+</sup> , Zn <sup>2+</sup> and Pt <sup>2+</sup>                                                 | Ion content decreased to about 10 <sup>-2</sup> mg / L after purification                                                                                 | Solar distillation | 2.5–3.6                                     |           | 99   |
| 52 | Cu@CuO/CG-aero Janus membrane                                                       | Cd <sup>2+</sup> , Pb <sup>2+</sup> , Cr <sup>2+</sup> (20ppm)                                                              | About 99.999 % of metal ions were removed after solar evaporation                                                                                         | Solar distillation | 1.32                                        | 88        | 34   |
| 53 | MoS <sub>2</sub> /C @ PU sponge                                                     | Ni <sup>2+</sup> (271mg/L), Hg <sup>+</sup> (200 ppb)                                                                       | Ni <sup>2+</sup> concentration decreased to 1 mg / L, and Hg <sup>2+</sup> concentration decreased to 1 ppb                                               | Solar distillation | 1.95                                        | 88        | 100  |
| 54 | MXene/LSC hydrogels (MLH)                                                           | Pb <sup>2+</sup> , Cu <sup>2+</sup> , Zn <sup>2+</sup> (5000 mg/L)                                                          | Pb <sup>2+</sup> , Cu <sup>2+</sup> , Zn <sup>2+</sup> concentrations decreased to 0.004, 0.138, 1.363 ppm, respectively                                  | Solar distillation | 2.73                                        | 92.3      | 30   |
| 55 | SA/MNP@rGO aerogel                                                                  | Mn <sup>2+</sup> , Cu <sup>2+</sup> , Ba <sup>2+</sup> , Ni <sup>2+</sup> (100 mg/L)                                        | Concentrations of Mn <sup>2+</sup> , Ba <sup>2+</sup> , Cu <sup>2+</sup> , Ni <sup>2+</sup> decreased to 0.1389, 4.53, 0.0504, 0.0564µg / L, respectively | Solar distillation | 2.64                                        | 93.9      | 101  |
| 56 | Co–Sn alloy@PTFE                                                                    | Mn <sup>2+</sup> , Co <sup>2+</sup> , Ni <sup>2+</sup> , Cu <sup>2+</sup> , Zn <sup>2+</sup> and Cd <sup>2+</sup> (100mg/L) | The ion retention rate was over 99.5 %                                                                                                                    | Solar distillation | 1.28                                        | 89        | 102  |
| 57 | Polyethyleneimine crosslinked carbon nanotubes/cellulose nanofibers (PEI@CNTs/CNFs) | Cu <sup>2+</sup> , Zn <sup>2+</sup> , Ni <sup>2+</sup> , Co <sup>2+</sup> (100mg/L)                                         | Cu <sup>2+</sup> , Zn <sup>2+</sup> , Ni <sup>2+</sup> , Co <sup>2+</sup> concentrations decreased to 0.4ppb, 0.2ppb, 0.1ppb, 0.02ppb, respectively       | Solar distillation | 1.9                                         | 91.4      | 103  |

Table S3(continued)

|    | Composition                                                                | Species of ions                                                                                                                  | Removal effect                                                                                                                                                      | Removal method     | RE<br>(kg m <sup>-2</sup> h <sup>-1</sup> ) | EE<br>(%) | Ref. |
|----|----------------------------------------------------------------------------|----------------------------------------------------------------------------------------------------------------------------------|---------------------------------------------------------------------------------------------------------------------------------------------------------------------|--------------------|---------------------------------------------|-----------|------|
| 58 | Foam-flamed-wood<br>(F-F-wood)                                             | Fe <sup>3+</sup> , Cr <sup>3+</sup> , Cu <sup>2+</sup>                                                                           | Removal of these ions was<br>close to 100 %                                                                                                                         | Solar distillation | 3.92                                        |           | 104  |
| 59 | WO <sub>3</sub> decorated on nickel<br>foam<br>(WO <sub>3-x</sub> /NF)     | Cu <sup>2+</sup> (10 <sup>6</sup> µg/L),Mn <sup>2+</sup> (10 <sup>5</sup> µg/L),Cd <sup>2+</sup><br>(10 <sup>4</sup> µg/L)       | The concentrations of Cu <sup>2+</sup> , Mn <sup>2+</sup> and<br>Cd <sup>2+</sup> decreased to below 0.87, 1.47 and<br>0.08 mg / L, respectively                    | Solar distillation | 1.50                                        | 88        | 105  |
| 60 | a-CNTs-PPy-C                                                               | Zn <sup>2+</sup> , Sr <sup>2+</sup> , Cu <sup>2+</sup> ,Fe <sup>3+</sup>                                                         | The retention rate of ions exceeded<br>99.9 %                                                                                                                       | Solar distillation | 1.61                                        | 91.2      | 106  |
| 61 | Activated carbon-juncus<br>effusus<br>(AC-JE)                              | Cu <sup>2+</sup> , Cd <sup>2+</sup> , Pb <sup>2+</sup> , and Zn <sup>2+</sup>                                                    | The concentrations of Cu <sup>2+</sup> , Cd <sup>2+</sup> , Pb <sup>2+</sup> ,<br>Zn <sup>2+</sup> decreased to 0.020, 0.0060, 0.076,<br>0.060 mg / L, respectively | Solar distillation | 2.23                                        |           | 37   |
| 62 | Semi-<br>coke/polydopamine@pho<br>tothermal melamine<br>sponge (SPMS)      | Pb <sup>2+</sup> , Cd <sup>2+</sup> , Ag <sup>+</sup> , Cu <sup>2+</sup> ,<br>Zn <sup>2+</sup> (1000mg/L)                        | Mixed heavy metal solution<br>have almost disappeared                                                                                                               | Solar distillation | 1.41                                        | 90.56     | 107  |
| 63 | PDA-modified biochar<br>composite<br>membrane                              | Cd <sup>2+</sup> , Cu <sup>2+</sup> , Ni <sup>2+</sup> , Pb <sup>2+</sup> , and Zn <sup>2+</sup>                                 | 99.5 % of heavy metal ions can be<br>removed                                                                                                                        | Solar distillation | 1.65                                        | 90.5      | 108  |
| 64 | Yolk-like non-<br>stoichiometric nickel<br>sulfide-based Janus<br>hydrogel | Cd <sup>3+</sup> , Co <sup>2+</sup> , Cu <sup>2+</sup> , Mn <sup>2+</sup> , Ni <sup>2+</sup> , and<br>Zn <sup>2+</sup> (100mg/L) | The removal rate of heavy metal ions<br>was 99.9 %                                                                                                                  | Solar distillation | 1.45                                        | 97        | 109  |



**Table S3**(continued)

| Composition                                                                     | Species of ions                                           | Removal effect                                                                                                                             | Removal method     | RE<br>(kg m <sup>-2</sup> h <sup>-1</sup> ) | EE<br>(%) | Ref. |
|---------------------------------------------------------------------------------|-----------------------------------------------------------|--------------------------------------------------------------------------------------------------------------------------------------------|--------------------|---------------------------------------------|-----------|------|
| 65 Superhydrophobic silicone sponge with multi-walled carbon nanotubes (MWCNTs) | Cu <sup>2+</sup> (1280mg/L), Zn <sup>2+</sup> (1300 mg/L) | The concentration of Cu <sup>2+</sup> and Zn <sup>2+</sup> decreased to 0.087 and 0.125 mg / L, and the ion removal rate was above 99.99 % | Solar distillation | 1.72                                        | 92.4      | 21   |

## References:

1. H. Z. , L. R. Ying, H. Huang, X. Qu, C. Wang, X. F. Wang, F. Duan, S. L. Lu and M. L. Du, *ACS Appl. Energ. Mater.*, 2021, **4**, 3563–3572.
2. T. D, Y. Lu, D. Q. Fan, H. H. Min, S. Ding and X. F. Yang, *Energy Technology*, 2020, **8**, 2000567.
3. W. Q, Y. W. Yang, J. Q. Zhao, Y. Han, M. M. Ju and X. T. Yin, *Chem. Eng. J.*, 2019, **373**, 955–962.
4. Y. C, J. Yang, X. H. Jia, Y. Li, S. Z. Wang and H. j. Song, *ACS Appl. Mater. Interfaces*, 2020, **12**, 47029–47037.
5. H. M, Y. L. Xu, X. S. Han, T. J. Sun, X. F. Fan, B. W. Lv, Z. L. Pan, Y. X. Song and C. W. Song, *Int. J. Energ. Res.*, 2021, **45**, 21476–21486.
6. Z. G, Y. Xu, J. Wang, Z. H. Chen, J. C. Yin, Z. X. Zhang, J. M. Huang, J. W. Qian and X. B. Wang, *ACS Appl. Mater. Interfaces*, 2021, **13**, 27129–27139.
7. J. Y, W. M. Zhang, Q. Su, J. Han and J. F. Gao, *J. Colloid. Interf. Sci.*, 2022, **612**, 66–75.
8. K. C, A. Y. Wei, P. F. Wang, Y. F. Gu, X. Y. Wang, X. J. Mu, Y. Z. Tian, J. H. Zhou, Z. Q. Sun, Y. L. Chen, J. H. Zhang, J. Liu and L. Miao, *Sol. Rrl.*, 2021, **5**, 2000782.
9. Z. L, X. L. Wang, Y. Wu, H. R. Guo, X. L. Zhang, Y. X. Yang, H. B. Mu and J. Y. Duan, *ACS Appl. Mater. Interfaces*, 2021, **13**, 10902–10915.
10. C. Y, T. Y. Ma, W. Guo, H. M. Lin, F. Zhang, H. X. Liu, L. Zhao, Y. Zhang, Y. Z. Wang, Y. T. Cui, J. X. Zhao and F. Y. Qu, *ACS Appl. Mater. Interfaces*, 2020, **14**, 27140–27149.
11. L. G, L. Song, Y. P. Tian, P. Mu and J. Li, *J. Mater. Chem. A*, 2021, **9**, 23117–23126.
12. L. W, Q. M. Wang, S. X. Song, Y. M. Li, F. F. Jia, T. Feng and N. Hu, *Desalination*, 2022, **525**, 115483.
13. Y. Qiao, Y. Gu, Y. S. Meng, H. X. Li, B. W. Zhang and J. Y. Li, *Nucl. Sci. Techn.*, 2021, **32**, 135.
14. D. W, H. Y. Peng and S. H. Fu, *Chem. Eng. J.*, 2021, **426**, 131818.
15. P. X, F. Ni, N. X. Qiu, C. Zhang, Y. Liang, J. C. Gu, J. Y. Xia, Z. X. Zeng, L. P. Wang, Q. J. Xue, T. Chen, *Nano Energy*, 2020, **68**, 04311.
16. A. G, X. Ming, Q. Zhang, Z. Z. Guo, F. Yu, B. F. Hou, Y. Wang, K. P. Homewood and X. B. Wang, *Carbon*, 2020, **167**, 285–295.
17. X. W, Y. Lu, D. Q. Fan, H. Yang, H. L. Xu, H. H. Min and X. F. Yang, *Sustain. Mater. Techno.*, 2020, **25**, e00180.
18. S. H, Y. J. Long, H. Yi, J. Q. Chen, J. H. Wu, Q. F. Liao, H. W. Liang, H. Z. Cui, S. C. Ruan and Y. J. Zeng, *J. Mater. Chem. A*, 2019, **7**, 26911–26916.
19. N. H, L. Li, B. Jiang, K. W. Yu, Q. Zhang, H. T. Zhang, D. W. Tang and Y. C. Song, *Adv. Funct. Mater.*, 2021, **31**, 2104380.
20. D. H, D. S. Li, C. W. Guo and C. L. Huang, *ACS Appl. Energ. Mater.*, 2021, **4**, 1752–1762.
21. L. L, T. Hu, Y. F. Yang and J. P. Zhang, *J. Mater. Chem. A*, 2020, **8**, 14736–14745.
22. G. Z, J. X. He, P. Mu, H. J. Wei, Y. N. Su, H. X. Sun, Z. Q. Zhu, W. D. Liang and A. Li, *Sol. Energ. Mat. Sol. C.*, 2019, **201**, 110111.
23. M. H, F. He, J. Zhang, Z. X. Wang, X. C. Wu, Y. Y. Zhou, L. F. Jiang, S. Q. Peng and Y.

- X. Li, *Nano Energy*, 2020, **71**, 104650.
24. J. Z, H. Y. Zhao, Z. L. Yu, L. F. Chen, H. J. Zhan, H. W. Zhu, J. Huang, L. A. Shi and S. H. Yu, *Cell Reports Physical Science*, 2020, **1**, 100074.
  25. N. L, L. Hao, H. Y. Bai, P. P. He, R. Niu and J. Gong, *J. Colloid. Interf. Sci.*, 2022, **608**, 840–852.
  26. H. L, Y. H. Guo, F. Zhao, X. Y. Zhou, W. Shi and G. H. Yu, *Adv. Mater.*, 2020, **32**, 1907061.
  27. H. L, F. Gong, W. B. Wang, J. G. Huang, D. W. Xia, J. X. Liao, M. Q. Wu and D. V. Papavassiliou, *Nano Energy*, 2019, **58**, 322–330.
  28. D. W, F. C. Xu, X. Li, Y. Li and J. Q. Sun, *CCS Chemistry*, 2021, **3**, 2494–2506.
  29. W. B, Y. K. Fan, P. Mu, Y. N. Su, Z. Q. Zhu, H. X. Sun, W. D. Liang and A. Li, *Sol. Energ. Mat. Sol. C.*, 2020, **206**, 110347.
  30. Y. L, D. Q. Fan, H. Zhang, H. L. Xu, C. H. Lu, Y. C. Tang and X. F. Yang, *Appl. Catal. B- Environ.*, 2021, **295**, 120285.
  31. Y. L, Z. C. Chen, Q. Li and X. M. Chen, *ACS Appl. Mater. Interfaces*, 2021, **13**, 40531–40542.
  32. J. L. Y, J. X. Chen, B. Li, Z. Y. Ye, D. L. Liu, D. Ding, F. Qian, N. V. Myung, Q. Zhang and Y. D. Yin, *ACS Nano*, 2020, **14**, 17419–17427.
  33. Y. L, X. H. Bai, F. Y. Zhang, Y. Q. Xu, S. F. Wang and G. S. Fu, *Environ. Sci-Water Res.*, 2019, **5**, 2041–2047.
  34. C. D, Q. Zhao, Y. Z. Jia, J. S. Yuan, G. M. Song, X. Zhou, S. S. Sun, C. Zhou, L. P. Zhao and S. Y. Yang, *Chem. Eng. J.*, 2020, **387**, 124131.
  35. S. J, Z. Zhang, H. N. Chen, H. Qi, Y. L. Chen, Y. J. Chen, Q. L. Deng and S. Wang, *Foods*, 2021, **10**, 3087.
  36. Y. Zhang, D. W. Zhao, F. Yu, C. Yang, J. W. Lou, Y. M. Liu, Y. Y. Chen, Z. Y. Wang, P. Tao, W. Shang, J. B. Wu, C. Y. Song and T. Deng, *Nanoscale*, 2017, **9**, 19384–19389.
  37. L. R, Q. Zhang, X. F. Xiao, Y. L. Chen, L. J. Xia, G. M. Zhao, H. J. Yang, X. B. Wang, W. L. Xu, *Carbon*, 2020, **156**, 225–233.
  38. X. J. Zha, X. Zhao, J. H. Pu, L. S. Tang, K. Ke, R. Y. Bao, L. Bai, Z. Y. Liu, M. B. Yang and W. Yang, *ACS Appl. Mater. Interfaces*, 2019, **11**, 36589–36597.
  39. H. Z, Y. W. Yang, Z. Y. Yin, J. Q. Zhao, X. T. Yin, N. Li, D. D. Yin, Y. N. Li, B. Lei, Y. P. Du and W. X. Que, *Mater. Horiz.*, 2018, **5**, 1143–1150.
  40. Z. W, J. L. Xu, C. Chang, C. Y. Song, J. B. Wu, W. Shang, P. Tao and T. Deng, *ACS Omega*, 2019, **4**, 16603–16611.
  41. J. X, X. Y. Wang, C. F. Ma, T. He, H. S. Qian, B. Wang, J. W. Liu and Y. Lu, *J. Mater. Chem. A*, 2019, **7**, 16696–16703.
  42. S. C, X. H. Wu, D. Ghim, Q. S. Jiang, S. Singamaneni and Y. S. Jun, *Nano Energy*., 2021, **79**, 105353.
  43. G. X, S. H. Wu, H. C. Yang, Y. K. Tian, B. Y. Gong, H. W. Wan, Y. Wang, T. S. Fisher, J. H. Yan, K. F. Cen, Z. Bo and K. Ostrikov, *Matter-Us.*, 2019, **1**, 1017–1032.
  44. H. G, C. Y. Wen, J. Yang, Q. S. Li, X. Y. Zhang, X. J. Sui, M. Y. Cao and L. Zhang, *Chem. Eng. J.*, 2021, **421**, 130344.
  45. H. S, Z. Qin, Y. N. Tang, S. Y. Yin, L. X. Yang, M. W. Xu and Z. N. Liu, *ACS Appl. Mater. Interfaces*, 2021, **13**, 19467–19475.

46. B. L. Peng, Y. J. Gao, Q. Q. Lyu, Z. J. Xie, M. M. Li, L. B. Zhang and J. T. Zhu, *ACS Appl. Mater. Interfaces*, 2021, **13**, 37724–37733.
47. Z. X. L. Noureen, Y. J. Gao, M. M. Li, M. Hussain, K. Wang, L. B. Zhang and J. T. Zhu, *ACS Appl. Mater. Interfaces*, 2020, **12**, 6343–6350.
48. L. L. Li, C. Guo, J. T. He, S. X. Wang, L. M. Yu, M. Wang, P. Murto and X. F. Xu, *Chem. Eng. J.*, 2022, **431**, 134144.
49. X. J. Z, S. Meng, C. Wu, X. Zhao, M. B. Yang and W. Yang, *Nano Letters*, 2021, **21**, 10516–10524.
50. H. J. Liu, Y. Liu, L. M. Wang, X. H. Qin and J. Y. Yu, *Carbon*, 2021, **177**, 199–206.
51. M. Z, Y. L. Li, Y. S. Xu, L. L. Chen, T. Jiang, W. C. Jiang, S. G. Yang and Y. Wang, *J. Mater. Chem. A*, 2019, **7**, 26769–26775.
52. Z. L, W. G Li, K. Bertelsmann and D. E. Fan, *Adv Mater.*, 2019, **31**, 1900720.
53. Y. J, J. Y. Li, X. Zhou, J. L. Mao, Y. J. Chen, H. X. Sun, X. F. Deng and C. Z. Gao, *Int. J. Energ. Res.*, 2021, **45**, 20132–20142.
54. W. Z, H. X. Li, M. Li, Y. Li, R. T. K. Kwok, J. W. Y. Lam, L. Wang, D. Wang and B. Z. Tang, *Adv. Mater.*, 2021, **33**, 2102258.
55. S. C, D. Li, R. R. Huang, C. R. Xue, P. F. Li, Y. S. Li, Q. Chang, H. Q. Wang, N. Li, S. P. Jia, S. L. Hu and J. L. Yang, *Ceramics International*, 2021, **47**, 19800–19808.
56. M. D, J. L. Li, G. X. Lv, L. Zhou, X. Q. Li, L. Bertoluzzi, C. H. Liu, S. N. Zhu and J. Zhu, *Adv. Mater.*, 2018, **30**, 1805159.
57. X. W, M. S. Irshad, A. Abbas, F. Yu, J. H. Li, J. Y. Wang, T. Mei, J. W. Qian, S. L. Wu and M. Q. Javed, *Carbon*, 2021, **176**, 313–326.
58. H. X, T. J. Chen, X. Qiao, S. Q. Hao, Z. Z. Wu, D. Sun, Z. Y. Liu, F. Cao, B. H. Wu and X. L. Fang, *ACS Appl. Mater. Interfaces*, 2020, **12**, 50397–50405.
59. P. T, C. Chang, J. L. Xu, B. W. Fu, C. Y. Song, J. B. Wu, W. Shang and T. Deng, *ACS Appl. Mater. Interfaces*, 2019, **11**, 18466–18474.
60. W. Z, P. Sun, I. Zada, Y. X. Zhang, J. J. Gu, Q. L. Liu, H. L. Su, D. Pantelić, B. Jelenković and D. Zhang, *ACS Appl. Mater. Interfaces*, 2020, **12**, 2171–2179.
61. C. K. Liu, C. J. Cai, F. Q. Ma, X. Z. Zhao and H. Ahmad, *J. Colloid. Interf. Sci.*, 2020, **560**, 103–110.
62. H. T. Qiao, B. W. Zhao, X. D. Suo, X. M. Xie, L. F. Dang, J. Yang and B. W. Zhang, *Global Challenges*, 2022, **6**, 2100083.
63. S. O, X. H. Xu, N. Bizmark, C. B. Arnold, S. S. Datta and R. D. Priestley, *Adv. Mater.*, 2021, **33**, 2007833.
64. C. C, Z. C. Wei, Y. Z. Huang, Y. Q. Wang and Y. Fu, *Nano Energy*, 2021, **86**, 106138.
65. H. Z, Q. Hou, W. Zhang, Q. Chang, J. L. Yang, C. R. Xue and S. L. Hu, *Sci. Total. Environ.*, 2021, **759**, 144317.
66. S. L, Z. M. Huang, X. Cui, Y. P. Wan, Y. F. Xiao, S. Tian, H. Wang, X. Z. Li, Q. Zhao and C. S. Lee, *J. Mater. Chem. A*, 2020, **8**, 10742–10746.
67. B. S, S. J. Sun, Y. M. Wang, M. F. A. Afari, H. Y. Mi, Z. H. Guo, C. T. Liu and C. Y. Shen, *Sep. Purif. Technol.*, 2022, **278**, 119621.
68. B. Y, C. F. Zhang, Y. Liang, L. X. Yang, L. J. Bai, H. W. Yang, D. L. Wei, F. Wang, Q. Y. Wang, W. X. Wang and H. Chen, *Mater. Chem. Phys.*, 2021, **258**, 123998.
69. Y. H, S. Li, Y. P. Guan, X. Y. Liu, H. X. Liu, M. S. Xie, L. Zhou, C. Wei, C. B. Yu and Y.

- H. Chen, *ACS Appl. Polym. Mater.*, 2020, **2**, 4581–4591.
70. X. L, W. Li, J. Liu, M. J. Zeng, X. Y. Feng, X. Q. Jia and Z. Z. Yu, *ACS Appl. Mater. Interfaces*, 2021, **13**, 22845–22854.
  71. N. W, R. Q. Xu, Z. K. Li, X. J. Song, Q. Li, K. Y. Sun, E. Q. Yang, L. K. Gong, Y. L. Sui, J. Tian, X. Wang, M. G. Zhao and H. Z. Cui, *J. Colloid. Interf. Sci.*, 2021, **584**, 125–133.
  72. Y. G, X. J. Mu, P. F. Wang, J. Q. Shi, A. Y. Wei, Y. Z. Tian, J. H. Zhou, Y. L. Chen, J. H. Zhang, Z. Q. Sun, J. Liu, B. L. Peng and L. Miao, *Sol. Rrl.*, 2020, **4**, 2000341.
  73. A. D, H. Q. Wang, X. J. Ji, C. Zhang, B. Zhou, Z. H. Zhang and J. Shen, *ACS Appl. Mater. Interfaces*, 2019, **11**, 42057–42065.
  74. J. L, X. Q. Li, J. Y. Lu, N. Xu, C. L. Chen, X. Z. Min, B. Zhu, H. X. Li, L. Zhou, S. N. Zhu, T. J. Zhang and J. Zhu, *Joule*, 2018, **2**, 1331–1338.
  75. Y. P. C. K. Liu, C. J. Cai, J. Y. Zhang and X. Z. Zhao, *J. Environ. Chem. Eng.*, 2021, **9**, 105272.
  76. X. T, W. Li, X. F. Li, J. Liu, C. J. Li, X. Y. Feng, C. Shu and Z. Z. Yu, *J. Colloid Interf. Sci.*, 2022, **606**, 748–757.
  77. B. L, Y. L. Xu, Y. Yang, X. F. Fan, Y. L. Yu, C. W. Song and Y. M. Liu, *Desalination*, 2021, **517**, 115260.
  78. X. C, J. F. Liu, H. Yang, J. Q. Tang, R. Miao, K. Q. Liu and Y. Fang, *Mater. Chem. Front.*, 2021, **5**, 1953–1961.
  79. H. L, Q. X. Zhou, D. D. Li, B. B. Wang, H. Wang, J. B. Bai, S. H. Ma and G. Wang, *J. Colloid. Interf. Sci.*, 2021, **592**, 77–86.
  80. X. R, Z. C. Xu, D. Wang, M. F. Zhong and Z. J. Zhang, *Desalination*, 2022, **525**, 115495.
  81. C. L, L. K. Gong, N. Wei, J. Li, J. Y. Shen, R. Q. Xu, Q. Li, J. Tian and H. Z. Cui, *Sep. Purif. Technol.*, 2021, **275**, 119139.
  82. N. A, M. S. Irshad, X. B. Wang, H. R. Li, M. Q. Javed, Y. Xu, L. A. Alshahrani, T. Mei and J. H. Li, *Sol. Rrl.*, 2021, **5**, 2100427.
  83. X. Z, J. Y. Li, Y. J. Jing, H. X. Sun, Z. Q. Zhu, W. D. Liang and A. Li, *ACS Appl. Mater. Interfaces*, 2021, **13**, 12181–12190.
  84. Q. Q, H. W. Jian, W. Wang and D. Yu, *Sep. Purif. Technol.*, 2021, **264**, 118459.
  85. J. X, F. J. Peng, X. L. Bai, G. P. Feng, X. H. Zeng, M. R. I. Raihan and H. F. Bao, *Sol. Energ. Mat. Sol. C.*, 2021, **221**, 110910.
  86. M. L, X. Y. Zhu, L. Song, X. F. Zhang and J. F. Yao, *Sep. Purif. Technol.*, 2022, **281**, 119912.
  87. Y. W, Z. M. Huang, J. L. Liang, Y. F. Xiao, X. Z. Li, X. Cui, S. Tian, Q. Zhao, S. L. Li, and S. Lee, *ACS Appl. Mater. Interfaces*, 2021, **13**, 31624–31634.
  88. M. L, R. F. Zhu, Y. Y. Hou, D. Wang, L. P. Zhang, D. Wang and S. H. Fu, *Chem. Eng. J.*, 2021, **423**, 129099.
  89. L. S, L. L. Zang, S. C. Zhang, C. Finnerty, A. Kim, J. Ma and B. X. Mi, *Chem. Eng. J.*, 2021, **422**, 129998.
  90. J. L. Li, X. Y. Wang, Z. H. Lin, N. Xu, X. Q. Li, J. Liang, W. Zhao, R. X. Lin, B. Zhu, G. L. Liu, L. Zhou, S. N. Zhu and J. Zhu, *Joule*, 2020, **4**, 928–937.
  91. L. S, Y. Z. Wu, C. X. Zhang, H. Gao, J. Chen, L. Jin, P. Lin, H. X. Zhang and Y. Y. Xia, *Desalination*, 2021, **505**, 114766.

92. Y. N, L. F. Su, Z. Q. Ma, Y. H. Zhang, C. L. Liu, Y. L. Zhang, L. Miao, J. H. Zhou, B. Wu and J. S. Qian, *Sol. Rrl.*, 2021, **5**, 2100210.
93. Y. Z, F. T. Meng, S. F. Zhang, B. Z. Ju and B. T. Tang, *Green Energy & Environment.*, 2021. DOI: 20.00003.
94. X. L, X. P. Li, H. G. Li, Y. Zhao, J. Wu, S. K. Yan and Z. Z. Yu, *Adv. Funct. Mater.*, 2021, **32**, 2110636.
95. D. W, R. F. Zhu, J. Y. Xie, Y. M. Liu, M. M. Liu and S. H. Fu, *Chem. Eng. J.*, 2022, **427**, 131618.
96. Y. G, J. X. Xiao, W. Q. Luo, D. Wang, S. K. Zhong, Y. R. Yue, C. N. Han, R. X. Lv, J. B. Feng, J. Q. Wang, W. Huang, X. L. Tian, W. Xiao and Y. J. Shen, *Nano Energy*, 2021, **87**, 106213.
97. X. W, M. S. Irshad, M. S. Abbasi, N. Arshad, Z. H. Chen, Z. Z. Guo, L. Yu, J. W. Qian, J. You and T. Mei, *ACS Sustain. Chem. Eng.*, 2021, **9**, 3880–3893.
98. L. L, H. Li, L. Xiong, B. Wang, G. Wang, S. H. Ma and X. J. Han, *ACS Appl. Nano Mater.*, 2021, **4**, 14274–14284.
99. J. Z, D. Huang, G. Wu, S. C. Chen and Y. Z. Wang, *J. Mater. Chem. A*, 2021, **9**, 15776–15786.
100. M. C. T, W. G. Li, Y. Huang, K. Bertelsmann, M. Lau and D. L. Fan, *Adv. Energy. Mater.*, 2018, **8**, 1802108.
101. T. C, M. L. Yang, J. S. Shi, J. Y. Zhang, Y. Zhang and L. L. Wang, *Colloid Surface. A.*, 2022, **632**, 127786.
102. L. Z, Y. Z. Wang, F. Zhang, K. Yu, C. Y. Yang, J. J. Jia, W. Guo, J. X. Zhao and F. Y. Qu, *ACS Appl. Mater. Interfaces*, 2021, **13**, 26879–26890.
103. M. K. A, M. T. He, H. J. Liu, M. R. Zheng, J. Q. Zhao, L. M. Wang, L. Liu, X. H. Qin and J. Y. Yu, *Composites Communications*, 2021, **28**, 100936.
104. D. Z, J. H. Chen, S. He, G. P. Xia, X. Y. Wang, Q. J. Xiang, T. L. Wen, Z. Y. Zhong and Y. L. Liao, *J. Mater. Sci. Technol.*, 2021, **66**, 157–162.
105. S. G, T. X. Wang, G. Wang, H. Wang, J. B. Bai, S. H. Ma and B. B. Wang, *J. Colloid Interf. Sci.*, 2021, **602**, 767–777.
106. Y. W, S. J. Sun, B. B. Sun, F. F. Zhang, Q. Xu, H. Y. Mi, H. Li, X. M. Tao, Z. H. Guo, C. T. Liu and C. Y. Shen, *ACS Appl. Mater. Interfaces*, 2021, **13**, 24945–24956.
107. X. X, L. J. Zhang, J. Feng, B. Bai, N. Hu and H. L. Wang, *Sol. Energ. Mat. Sol. C.*, 2021, **230**, 111237.
108. L. Z, S. C. Zhang, T. W. Dou, J. L. Zou, Y. H. Zhang and L. G. Sun, *ACS Omega*, 2020, **5**, 2878-2885.
109. T. M, Y. Zhang, F. Zhang, W. Guo, K. Yu, C. Y. Yang and F. Y. Qu, *J. Colloid. Interf. Sci.*, 2022, **607**, 1446–1456.
